# Supplementary material for: High out-of-plane negative Poisson's ratios and strong light harvesting in two-dimensional SiS2 and its derivatives
Source: Royal Society of Chemistry journal article supplement (doi:10.1039/d3nr04483a), 2023-01-01
Supplement: d3nr04483a1.pdf [file d3nr04483a1.pdf]

Electronic Supplementary Information for

# High out-of-plane negative Poisson's ratios and strong light harvesting in two-dimensional SiS<sub>2</sub> and its derivatives

Haidi Wang<sup>a</sup>, Tao Li<sup>a</sup>, Zhao Chen<sup>a</sup>, Weiduo Zhu<sup>a</sup>, Wei Lin<sup>a</sup>, Huimiao Wang<sup>b</sup>, Xiaofeng Liu<sup>\*a</sup>, Zhongjun Li<sup>\*a</sup>

<sup>a</sup>School of Physics, Hefei University of Technology, Hefei, Anhui 230601, China

<sup>b</sup>School of Civil and Hydraulic Engineering, Hefei University of Technology, Hefei, Anhui 230601, China

\*Email: lxf@hfut.edu.cn, zjli@hfut.edu.cn

## 1 Calculation Method

For monolayer SiS<sub>2</sub>, four independent elastic constants ( $C_{11}, C_{12}, C_{22}$  and  $C_{66}$ ), which can be obtained via energy-strain approach or stress-strain approach. Once the independent elastic constants are obtained, the direction-dependent Young's modulus and Poisson's ratio can be calculated via following equations:

$$E(\theta) = \frac{d_4}{\cos^4\theta + d_2\cos^2\theta\sin^2\theta + d_3\sin^4\theta} \quad (S1)$$

$$\nu(\theta) = \frac{d_0\cos^4\theta - d_1\cos^2\theta\sin^2\theta + d_3\sin^4\theta}{\cos^4\theta + d_2\cos^2\theta\sin^2\theta + d_3\sin^4\theta} \quad (S2)$$

where,  $d_0 = \frac{C_{12}}{C_{22}}$ ,  $d_1 = \frac{C_{11}}{C_{22}} + 1 - \frac{C_{11}C_{22} - C_{12}^2}{C_{22}C_{66}}$ ,  $d_2 = -(2\frac{C_{12}}{C_{22}} - \frac{C_{11}C_{22} - C_{12}^2}{C_{22}C_{66}})$ ,  $d_3 = \frac{C_{11}}{C_{22}}$  and  $d_4 = \frac{C_{11}C_{22} - C_{12}^2}{C_{22}}$ .

## 2 Properties of MX<sub>2</sub>

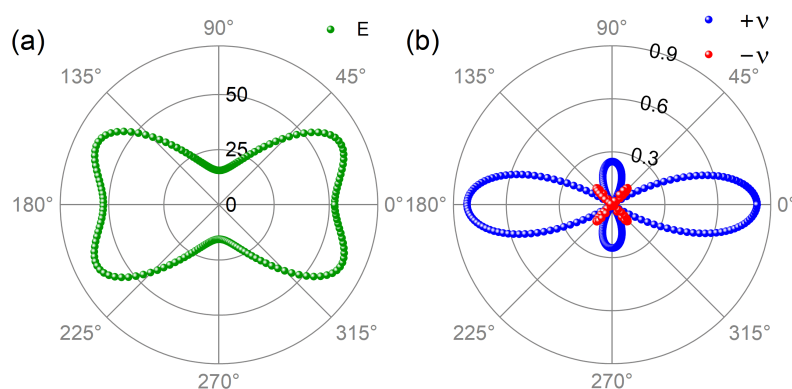

Figure S1: (a) The polar plot of Young's modulus (GPa) and Poisson's ratio (b) of bulk SiS<sub>2</sub> in the  $xy$  plane.

Table S1: The lattice parameters( $\text{\AA}$ ), maximum Young's Modulus  $E_{max}$ (GPa), in-plane Poisson's ratio( $\nu_i$ ) and HSE level Bandgap  $E_g$ (eV) of SiS<sub>2</sub> with different layer numbers.

| Layer     | a    | b    | $E_{max}$ | $\nu_i$ | $E_g$ |
|-----------|------|------|-----------|---------|-------|
| Monolayer | 5.93 | 8.09 | 96.95     | -0.12   | 4.50  |
| Bilayer   | 5.93 | 8.12 | 99.50     | -0.14   | 4.45  |
| Trilayer  | 5.92 | 8.15 | 63.71     | -0.13   | 4.38  |
| Bulk      | 5.93 | 8.09 | 63.84     | -0.13   | 4.15  |

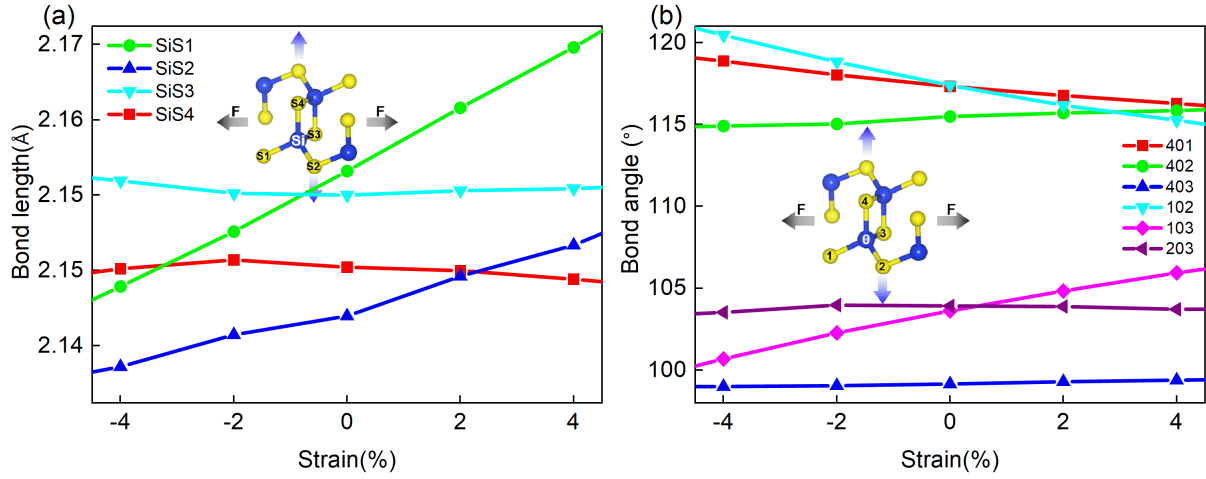

Figure S2: The variation of bond lengths (a) and bond angles (b) with strain within the linear elastic range. From the graphs of bond length and bond angle changes, it is evident that under external stress, the bond lengths of Si-S1, Si-S2, and Si-S4 increase with the increase in strain, while the bond length of Si-S3 decreases with increasing strain. Simultaneously, bond angle 102 decreases with increasing strain, while bond angle 304 remains almost constant with strain. This overall effect results in an increase in the distance between the upper and lower atomic layers, leading to an out-of-plane negative Poisson's ratio.

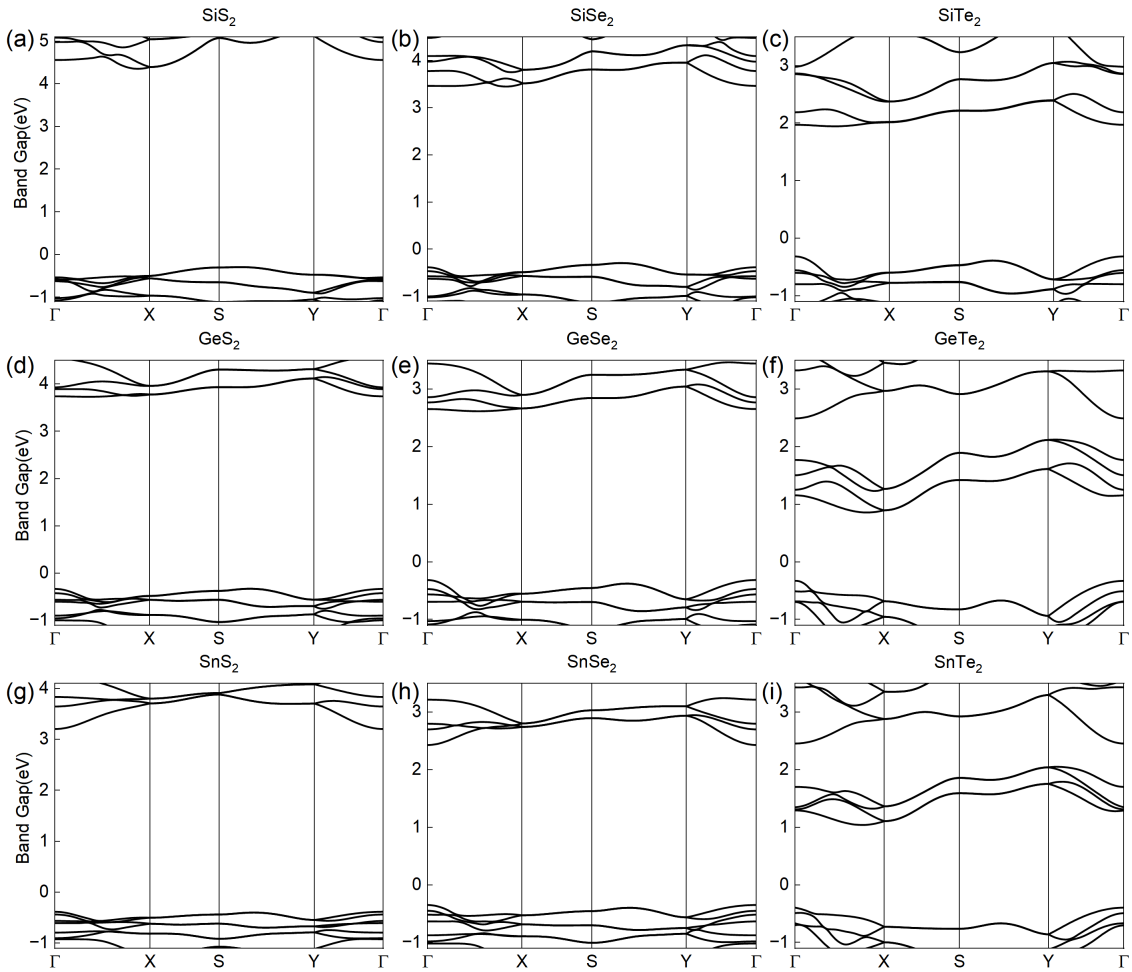

Figure S3: (a-f) The HSE level band structures of  $\text{MX}_2$  ( $M = \text{Si, Ge, Sn}$  and  $X = \text{S, Te}$ ), respectively.

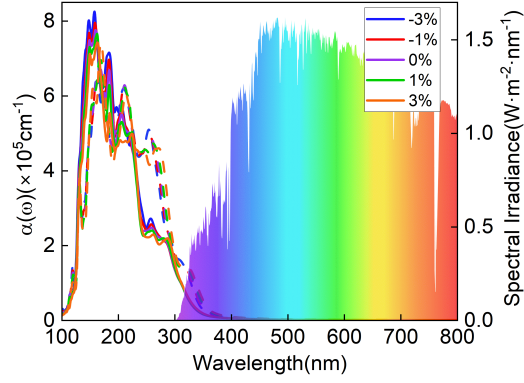

Figure S4: The optical absorption of  $\text{SiS}_2$  in the  $xy$  direction under strain. The solid line represents the  $y$ -direction, while the dashed line represents the  $x$ -direction.

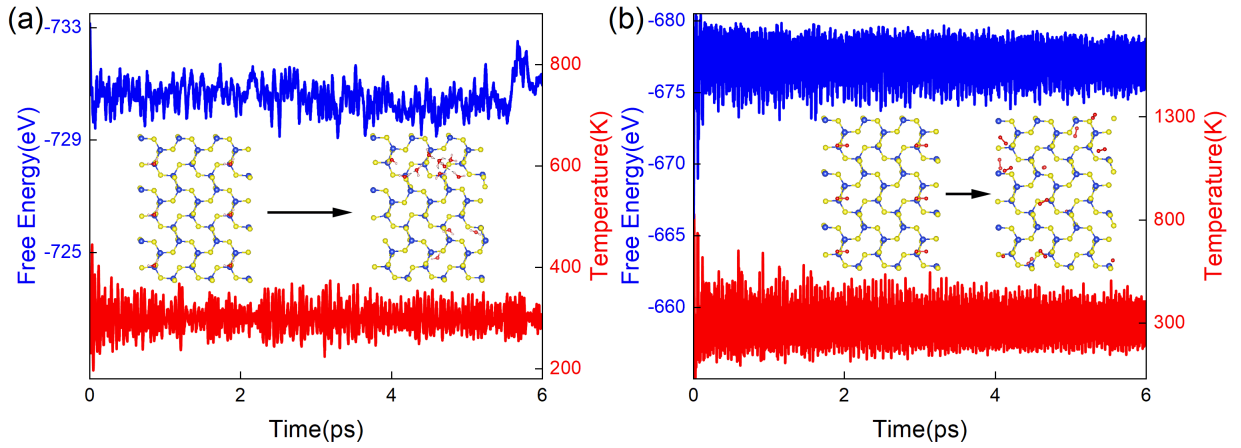

Figure S5: (a) and (b) represent the molecular dynamics simulations of  $\text{SiS}_2$  at 300K under the influence of  $\text{H}_2\text{O}$  and  $\text{O}_2$  molecules, respectively.
